# Supplementary material for: β-lactam Resistance in Pseudomonas aeruginosa: Current Status, Future Prospects
Source: MDPI journal article supplement (doi:10.3390/pathogens10121638), 2021-12-18
Supplement: s1 [file s1]

## Supplementary Material

**Table S1.** *P. aeruginosa* PBP3 variants within the transpeptidase domain<sup>a</sup>.

[illegible]

<sup>a</sup>Sequence variants in the transpeptidase domain of PBP3 in clinical isolates and experimentally evolved  $\beta$ -lactam-resistant mutants are listed. Variants predicted using the bioinformatics tool Provean<sup>1, 17, 18</sup> to affect protein function are shown in red, and those predicted to not significantly affect protein function are in blue. The table is derived from a figure from<sup>1</sup>.

**Table S2.** *P. aeruginosa* PBP3 variants outside the transpeptidase domain<sup>a</sup>

| PBP3 variants | A9T               | W13R | R14L | A28T | D40V | G46S | A60V | G63S/D/C/R | I65T | R153S | R175H | G188A | G191E/D | N212T | P215L | G216S | R226C |       |
|---------------|-------------------|------|------|------|------|------|------|------------|------|-------|-------|-------|---------|-------|-------|-------|-------|-------|
|               | Clinical Isolates |      |      |      |      |      |      |            |      |       |       |       |         |       |       |       |       | Study |
|               |                   |      |      |      |      |      |      |            |      |       |       |       |         |       |       |       |       | 3     |
|               |                   |      |      |      |      |      |      |            |      |       |       |       |         |       |       |       |       | 4     |
|               |                   |      |      |      |      |      |      |            |      |       |       |       |         |       |       |       |       | 5     |
|               |                   |      |      |      |      |      |      |            |      |       |       |       |         |       |       |       |       | 8     |
|               |                   |      |      |      |      |      |      |            |      |       |       |       |         |       |       |       |       | 10    |
|               |                   |      |      |      |      |      |      |            |      |       |       |       |         |       |       |       |       | 11    |
|               |                   |      |      |      |      |      |      |            |      |       |       |       |         |       |       |       |       | 12    |
|               |                   |      |      |      |      |      |      |            |      |       |       |       |         |       |       |       |       | 14    |

<sup>a</sup>Sequence variants in the cytoplasmic (yellow), membrane spanning alpha-helix (green) and domain likely involved in protein-protein interactions (Brown) of PBP3 in clinical isolates and experimentally evolved  $\beta$ -lactam-resistant mutants are listed. Variants predicted using the bioinformatics tool Provean <sup>1, 17, 18</sup> to affect protein function are shown in red, and those predicted to not significantly affect protein function in blue. Figure is derived from a figure from <sup>1</sup>.

References

1. Clark, S. T.; Sinha, U.; Zhang, Y.; Wang, P. W.; Donaldson, S. L.; Coburn, B.; Waters, V. J.; Yau, Y. C. W.; Tullis, D. E.; Guttman, D. S.; Hwang, D. M., Penicillin-binding protein 3 is a common adaptive target among *Pseudomonas aeruginosa* isolates from adult cystic fibrosis patients treated with  $\beta$ -lactams. *International Journal of Antimicrobial Agents* **2019**, 53 (5), 620-628.

2. del Barrio-Tofiño, E.; López-Causapé, C.; Cabot, G.; Rivera, A.; Benito, N.; Segura, C.; Montero, M. M.; Sorlí, L.; Tubau, F.; Gómez-Zorrilla, S., Genomics and susceptibility profiles of extensively drug-resistant *Pseudomonas aeruginosa* isolates from Spain. *Antimicrobial Agents and Chemotherapy* **2017**, 61 (11), e01589-17.

3. Jorth, P.; McLean, K.; Ratjen, A.; Secor, P. R.; Bautista, G. E.; Ravishankar, S.; Rezayat, A.; Garudathri, J.; Harrison, J. J.; Harwood, R. A., Evolved aztreonam resistance is multifactorial and can produce hypervirulence in *Pseudomonas aeruginosa*. *mBio* **2017**, 8 (5), e00517-17.

4. López-Causapé, C.; Sommer, L. M.; Cabot, G.; Rubio, R.; Ocampo-Sosa, A. A.; Johansen, H. K.; Figuerola, J.; Cantón, R.; Kidd, T. J.; Molin, S., Evolution of the *Pseudomonas aeruginosa* mutational resistome in an international cystic fibrosis clone. *Scientific Reports* **2017**, 7 (1), 1-15.
5. Cabot, G.; Lopez-Causape, C.; Ocampo-Sosa, A. A.; Sommer, L. M.; Dominguez, M. A.; Zamorano, L.; Juan, C.; Tubau, F.; Rodriguez, C.; Moya, B.; Pena, C.; Martinez-Martinez, L.; Plesiat, P.; Oliver, A., Deciphering the resistome of the widespread *Pseudomonas aeruginosa* sequence type 175 international high-risk clone through whole-genome sequencing. *Antimicrobial Agents and Chemotherapy* **2016**, 60 (12), 7415-7423.
6. Diaz Caballero, J.; Clark, S. T.; Coburn, B.; Zhang, Y.; Wang, P. W.; Donaldson, S. L.; Tullis, D. E.; Yau, Y. C.; Waters, V. J.; Hwang, D. M.; Guttman, D. S., Selective sweeps and parallel pathoadaptation drive *Pseudomonas aeruginosa* evolution in the cystic fibrosis lung. *mBio* **2015**, 6 (5), e00981-15.
7. Marvig, R. L.; Sommer, L. M.; Molin, S.; Johansen, H. K., Convergent evolution and adaptation of *Pseudomonas aeruginosa* within patients with cystic fibrosis. *Nature Genetics* **2015**, 47 (1), 57-64.
8. Jorth, P.; Staudinger, B. J.; Wu, X.; Hisert, K. B.; Hayden, H.; Garudathri, J.; Harding, C. L.; Radey, M. C.; Rezayat, A.; Bautista, G.; Berrington, W. R.; Goddard, A. F.; Zheng, C.; Angermeyer, A.; Brittnacher, M. J.; Kitzman, J.; Shendure, J.; Fligner, C. L.; Mittler, J.; Aitken, M. L.; Manoil, C.; Bruce, J. E.; Yahr, T. L.; Singh, P. K., Regional isolation drives bacterial diversification within cystic fibrosis lungs. *Cell Host Microbe* **2015**, 18 (3), 307-319.
9. Markussen, T.; Marvig, R. L.; Gómez-Lozano, M.; Aanaes, K.; Burleigh, A. E.; Høiby, N.; Johansen, H. K.; Molin, S.; Jelsbak, L., Environmental heterogeneity drives within-host diversification and evolution of *Pseudomonas aeruginosa*. *mBio* **2014**, 5 (5), e01592-14.
10. Marvig, R. L.; Johansen, H. K.; Molin, S.; Jelsbak, L., Genome analysis of a transmissible lineage of *Pseudomonas aeruginosa* reveals pathoadaptive mutations and distinct evolutionary paths of hypermutators. *PLOS Genetics* **2013**, 9 (9), e1003741.
11. Yang, L.; Jelsbak, L.; Marvig, R. L.; Damkiaer, S.; Workman, C. T.; Rau, M. H.; Hansen, S. K.; Folkesson, A.; Johansen, H. K.; Ciofu, O.; Hoiby, N.; Sommer, M. O.; Molin, S., Evolutionary dynamics of bacteria in a human host environment. *Proceedings of the National Academy of Sciences of the United States of America* **2011**, 108 (18), 7481-7486.
12. Chotirmall, S. H.; Sherrard, L. J.; Tai, A. S.; Wee, B. A.; Ramsay, K. A.; Kidd, T. J.; Ben Zakour, N. L.; Whiley, D. M.; Beatson, S. A.; Bell, S. C., Within-host whole genome analysis of an antibiotic resistant *Pseudomonas aeruginosa* strain sub-type in cystic fibrosis. *PLOS ONE* **2017**, 12 (3).
13. Colque, C. A.; Albarracin Orio, A. G.; Feliziani, S.; Marvig, R. L.; Tobares, A. R.; Johansen, H. K.; Molin, S.; Smania, A. M., Hypermutator *Pseudomonas aeruginosa* exploits multiple genetic pathways to develop multidrug resistance during long-term infections in the airways of cystic fibrosis patients. *Antimicrobial Agents and Chemotherapy* **2020**.
14. McLean, K.; Lee, D.; Holmes, E. A.; Penewit, K.; Waalkes, A.; Ren, M.; Lee, S. A.; Gasper, J.; Manoil, C.; Salipante, S. J., Genomic analysis identifies novel *Pseudomonas aeruginosa* resistance genes under selection during inhaled aztreonam therapy in vivo. *Antimicrobial Agents and Chemotherapy* **2019**, 63 (9), e00866-19.
15. Khaledi, A.; Weimann, A.; Schniederjans, M.; Asgari, E.; Kuo, T.-H.; Oliver, A.; Cabot, G.; Kola, A.; Gastmeier, P.; Hogardt, M.; Jonas, D.; Mofrad, M. R.; Bremges, A.; McHardy, A. C.; Häussler, S., Predicting antimicrobial resistance in *Pseudomonas aeruginosa* with machine learning-enabled molecular diagnostics. *EMBO Molecular Medicine* **2020**, 12 (3), e10264.
16. Cabot, G.; Zamorano, L.; Moya, B.; Juan, C.; Navas, A.; Blazquez, J.; Oliver, A., Evolution of *Pseudomonas aeruginosa* antimicrobial resistance and fitness under low and high mutation rates. *Antimicrobial Agents and Chemotherapy* **2016**, 60 (3), 1767-1778.
17. Wardell, S. J. T.; Rehman, A.; Martin, L. W.; Winstanley, C.; Patrick, W. M.; Lamont, I. L., A large-scale whole-genome comparison shows that experimental evolution in response to antibiotics predicts changes in naturally evolved clinical *Pseudomonas aeruginosa*. *Antimicrobial Agents and Chemotherapy* **2019**, e01619-19.
18. Choi, Y.; Sims, G. E.; Murphy, S.; Miller, J. R.; Chan, A. P., Predicting the functional effect of amino acid substitutions and indels. **2012**.
